# Supplementary material for: The Yin and Yang of Breast Cancer: Ion Channels as Determinants of Left–Right Functional Differences
Source: MDPI journal article supplement (doi:10.3390/ijms241311121), 2023-07-05
Supplement: s1 [file s1]

Mouse 2 Left

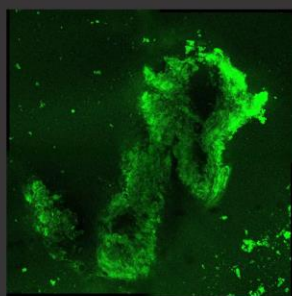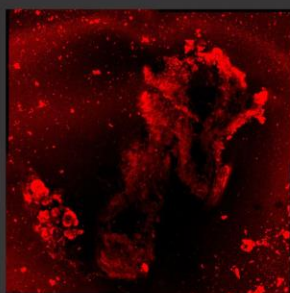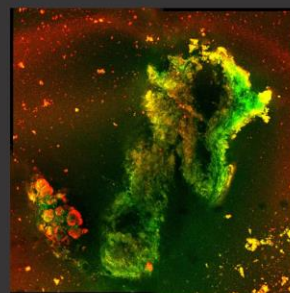

Mouse 2 Right

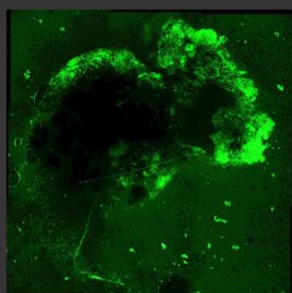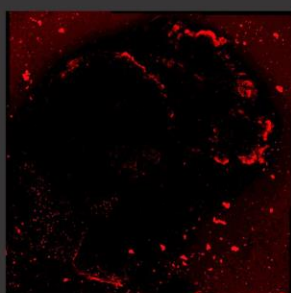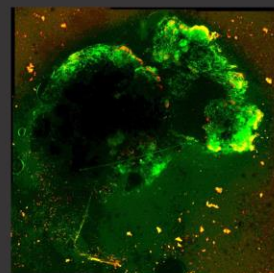

Mouse 3 Left

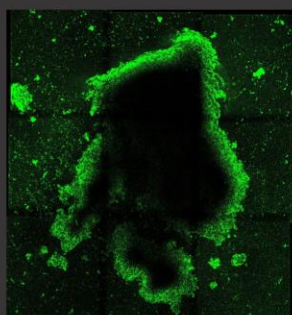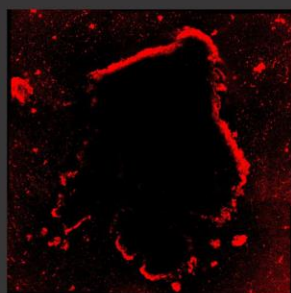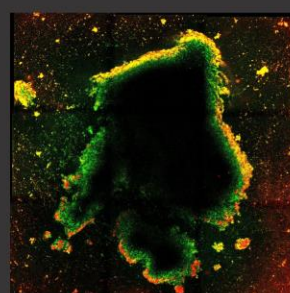

Mouse 3 Right

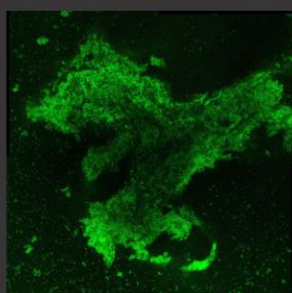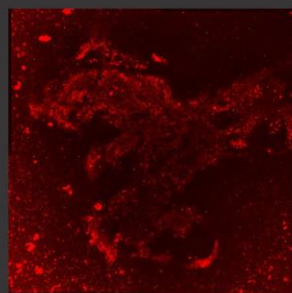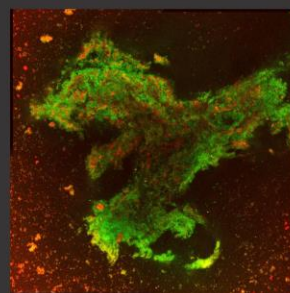

Supplementary Figure S1A

Mouse 4 Left

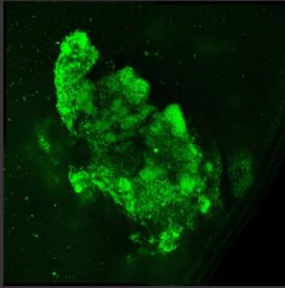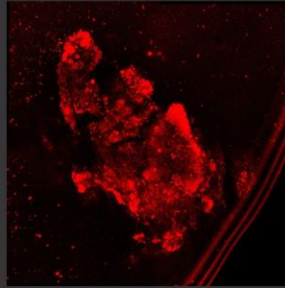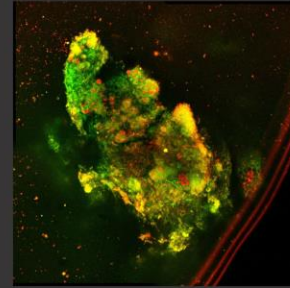

Mouse 4 Right

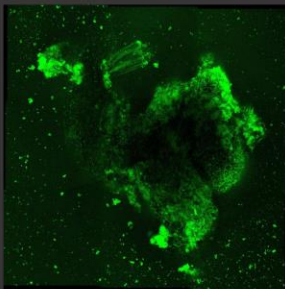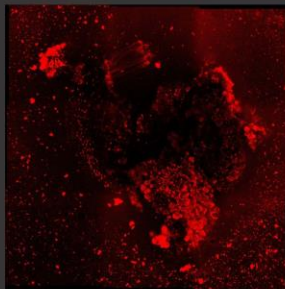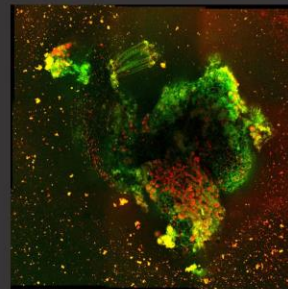

Mouse 5 Left

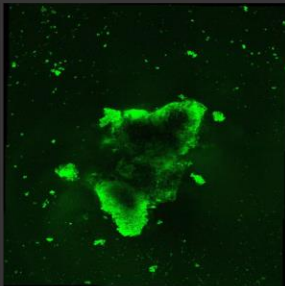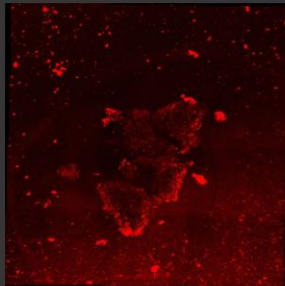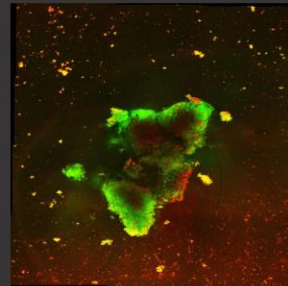

Mouse 5 Right

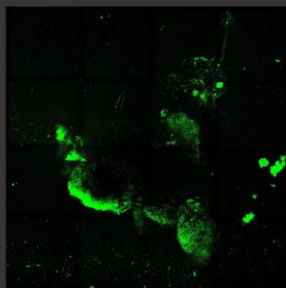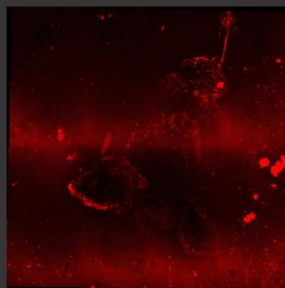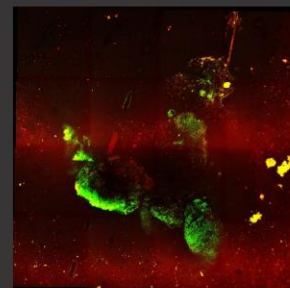

Supplementary Figure S1B
